# Supplementary material
Source: publisher site journal article supplement (https://kjim.org/upload/media/kjim-2023-303-Supplementary-Table-3.pdf)
Supplement: Supplementary file 1 [file kjim-2023-303-Supplementary-Table-3.pdf]

**Supplementary Table 3. Baseline characteristics of metformin users and non-users after propensity score matching in men**

| Variable                   | Men                         |                                 | p value |
|----------------------------|-----------------------------|---------------------------------|---------|
|                            | Metformin users (n = 3,386) | Metformin non-users (n = 3,386) |         |
| Age group (yr)             |                             |                                 | > 0.999 |
| 18–24                      | 1 (0.0)                     | 1 (0.0)                         |         |
| 25–34                      | 21 (0.6)                    | 21 (0.6)                        |         |
| 35–44                      | 202 (6.0)                   | 202 (6.0)                       |         |
| 45–54                      | 629 (18.6)                  | 629 (18.6)                      |         |
| 55–64                      | 823 (24.3)                  | 823 (24.3)                      |         |
| 65–74                      | 823 (24.3)                  | 823 (24.3)                      |         |
| > 75                       | 887 (26.2)                  | 887 (26.2)                      |         |
| Age (yr)                   | 65 (54–75)                  | 65 (54–75)                      | > 0.999 |
| Region, metropolitan       | 1,416 (41.8)                | 1,518 (44.8)                    | 0.01    |
| Nationality, Korean        | 3,372 (99.6)                | 3,364 (99.4)                    | 0.18    |
| Household income           |                             |                                 | 0.24    |
| 0 (lowest)                 | 330 (9.8)                   | 368 (10.9)                      |         |
| 1                          | 548 (16.2)                  | 494 (14.6)                      |         |
| 2                          | 484 (14.3)                  | 486 (14.4)                      |         |
| 3                          | 513 (15.2)                  | 541 (16.0)                      |         |
| 4                          | 670 (19.8)                  | 636 (18.8)                      |         |
| 5 (highest)                | 841 (24.8)                  | 861 (25.4)                      |         |
| Disability                 |                             |                                 | < 0.01  |
| No                         | 2,783 (82.2)                | 2,752 (81.3)                    |         |
| Physical disability        | 578 (17.1)                  | 563 (16.6)                      |         |
| Internal disability        | 25 (0.7)                    | 71 (2.1)                        |         |
| Lesion site of TB          |                             |                                 |         |
| Pulmonary                  | 3,110 (91.9)                | 3,019 (89.2)                    | < 0.01  |
| Extra-pulmonary            | 276 (8.2)                   | 367 (10.8)                      | < 0.01  |
| TB history                 |                             |                                 |         |
| New case                   | 2,874 (84.9)                | 2,846 (84.1)                    | 0.35    |
| Previously treated TB      | 512 (15.1)                  | 540 (16.0)                      | 0.35    |
| PPM hospital               | 2,384 (70.4)                | 2,466 (72.8)                    | 0.03    |
| AFB smear positivity       | 1,371 (40.5)                | 1,360 (40.2)                    | 0.12    |
| Culture positivity         | 1,866 (55.1)                | 1,745 (51.5)                    | 0.01    |
| Charlson Comorbidity Index |                             |                                 | > 0.999 |
| 0                          | 1,121 (33.1)                | 1,121 (33.1)                    |         |
| 1                          | 1,465 (43.3)                | 1,465 (43.3)                    |         |
| 2                          | 250 (7.4)                   | 250 (7.4)                       |         |
| ≥ 3                        | 550 (16.2)                  | 550 (16.2)                      |         |
| Comorbidity                |                             |                                 |         |
| Transplantation            | 7 (0.2)                     | 46 (1.4)                        | < 0.01  |
| HIV                        | 1 (0.0)                     | 2 (0.1)                         | 0.56    |
| Cancer                     | 117 (3.5)                   | 173 (5.1)                       | < 0.01  |

**Supplementary Table 3. Continued**

| Variable                          | Men                         |                                 | p value |
|-----------------------------------|-----------------------------|---------------------------------|---------|
|                                   | Metformin users (n = 3,386) | Metformin non-users (n = 3,386) |         |
| Notification year                 |                             |                                 | > 0.999 |
| 2011                              | 537 (15.9)                  | 529 (15.6)                      |         |
| 2012                              | 499 (14.7)                  | 507 (15.0)                      |         |
| 2013                              | 489 (14.4)                  | 491 (14.5)                      |         |
| 2014                              | 179 (14.2)                  | 478 (14.1)                      |         |
| 2015                              | 454 (13.4)                  | 453 (13.4)                      |         |
| 2016                              | 462 (13.6)                  | 462 (13.6)                      |         |
| 2017                              | 466 (13.8)                  | 466 (13.8)                      |         |
| Anti-diabetic treatment           |                             |                                 |         |
| Sulfonylurea                      | 1,950 (57.6)                | 2,111 (62.3)                    | < 0.01  |
| Insulin                           | 141 (4.2)                   | 439 (13.0)                      | < 0.01  |
| Other DM medication <sup>a)</sup> | 2,126 (62.8)                | 2,153 (63.6)                    | 0.50    |
| Follow-up duration (d)            | 224 (184–294)               | 237 (184–298)                   | 0.23    |
| Treatment outcome                 |                             |                                 | < 0.01  |
| Treatment success/failure         | 3,076 (90.8)                | 2,981 (88.0)                    |         |
| Death due to all causes           | 310 (9.2)                   | 405 (12.0)                      |         |
| Cause of death                    |                             |                                 | 0.11    |
| TB-related deaths                 | 54 (1.6)                    | 53 (1.6)                        |         |
| Non-TB-related deaths             | 256 (7.6)                   | 352 (10.4)                      |         |

Values are presented as number (%) or median (interquartile range).

AFB, acid-fast bacilli; DM, diabetes mellitus; HIV, human immunodeficiency virus; PPM, public-private mix; TB, tuberculosis.

<sup>a)</sup>Other DM medications include dipeptidyl peptidase-4 inhibitors, glinide, thiazolidinedione, glucagon-like peptide-1, alpha-glucosidase inhibitors, and sodium-glucose cotransporter-2 inhibitors.
